# Supplementary material for: Depletion of a Toxoplasma porin leads to defects in mitochondrial morphology and contacts with the endoplasmic reticulum
Source: Oxford University Press journal article supplement (doi:10.1242/jcs.255299), 2021-09-15
Supplement: jcs255299supp.pdf [file jcs255299supp.pdf]

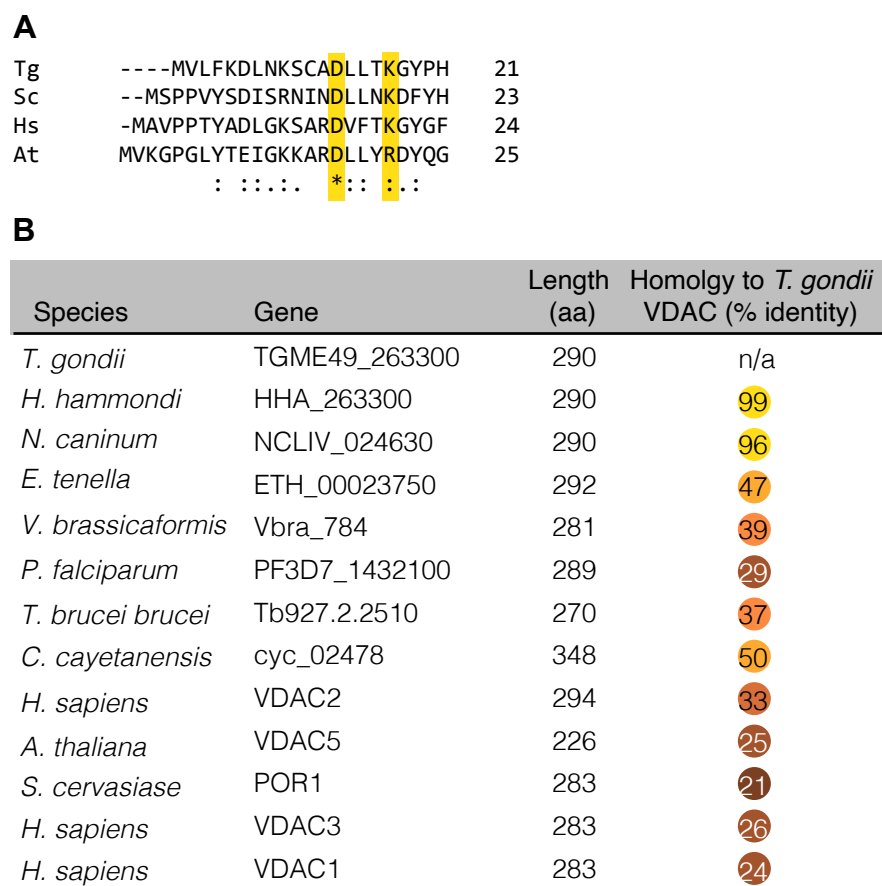

**Fig. S1. Phylogenetic analysis of VDAC from *T. gondii***

**A)** VDAC from *T. gondii* (Tg) contains glycine and lysine residues at positions 16 and 20 respectively which are conserved between human (Hs), yeast (Sc) and plants (At, D21 only). **B)** Table showing the gene ID, length (in amino acids) and percentage identity to *T. gondii* of VDACS from selected species.

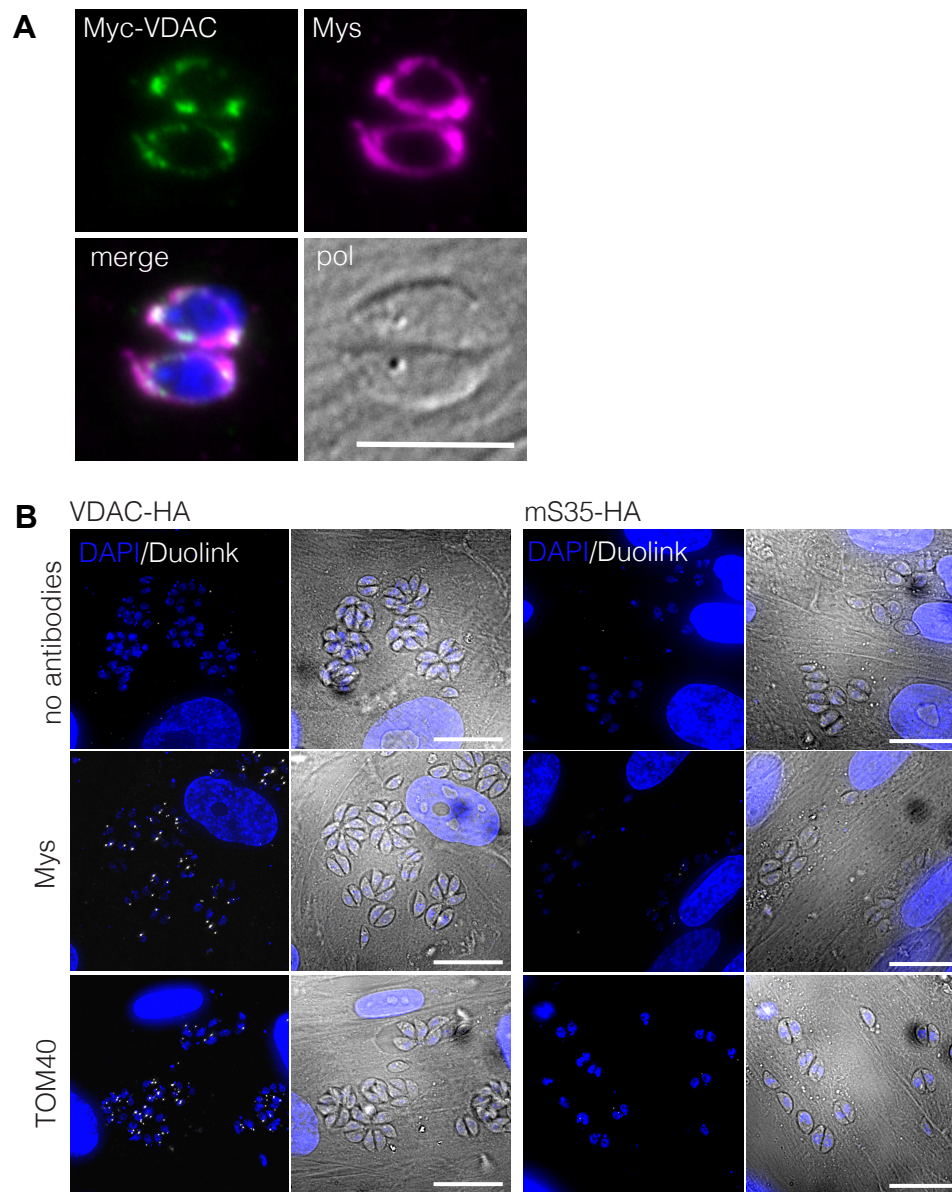

**Figure S2. VDAC localises to the outer membrane of the mitochondrion**  
**A)** Overexpression of Myc-VDAC (green) co-localized with anti-Mys, a mitochondrial membrane marker. Scale bar 5  $\mu\text{m}$ . **B)** Larger scale representative images of the Duolink PLA, showing many vacuoles per field, demonstrating that when seen, PLA signal is seen in most/all cells. Scale bar 20  $\mu\text{m}$

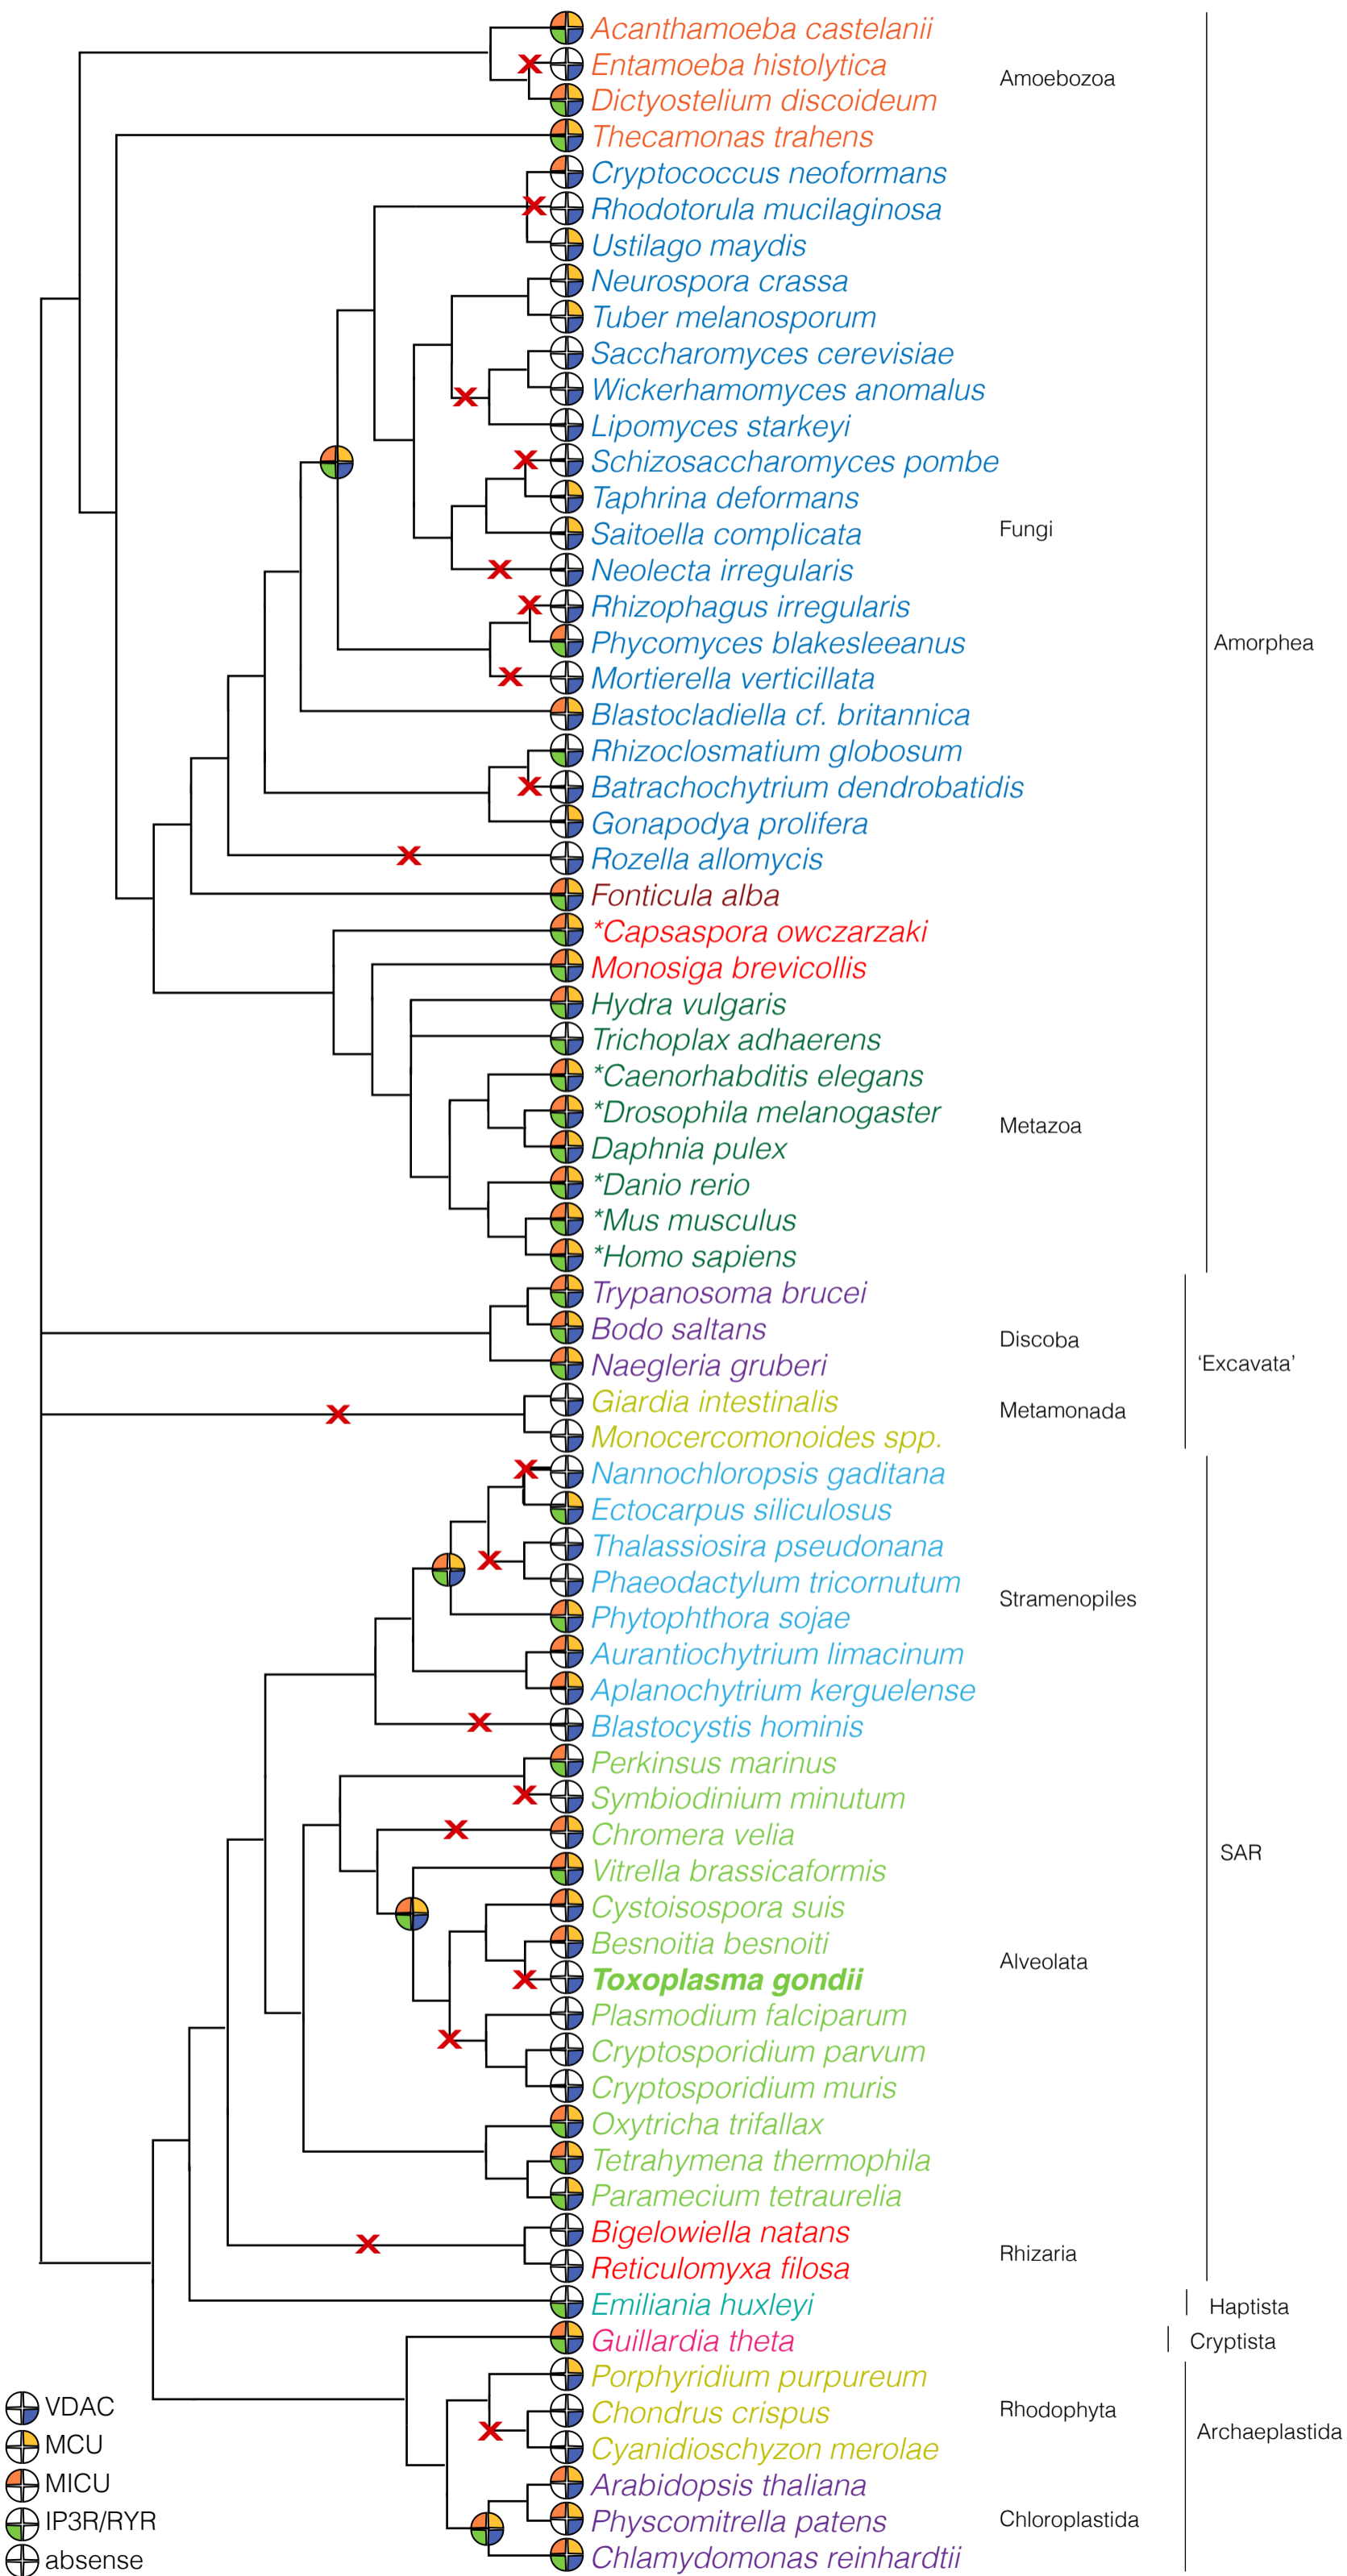

**Fig. S3. MCU, MICU, and IP3R have been lost 19 times in the evolution of eukaryotes**

Orthologues of MCU, MICU, and IP3R were identified using BLAST and phylogenetic reconstructions. Organisms with identified orthologues are marked as indicated in the figure legend. Most eukaryotes contain homologues that could not be unambiguously identified as ITPR1 or RYR3. Asterisks indicate organisms containing both ITPR1 and RYR3 orthologues.



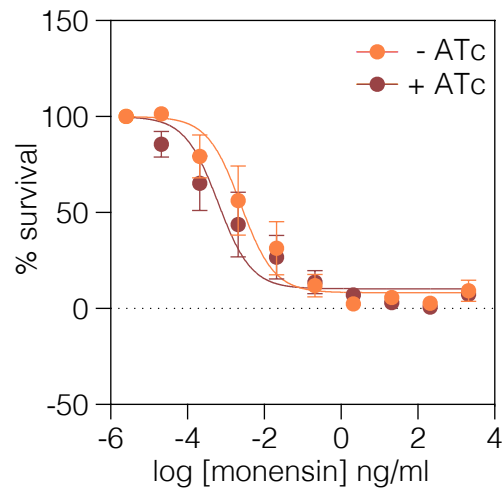

**Fig. S4. Monensin IC50 is not affected by VDAC depletion**

Growth curve generated using fluorescent iVDAC parasites grown with or without ATc in the presence of different concentrations of monensin. Results mean  $\pm$  SEM, n = 4.

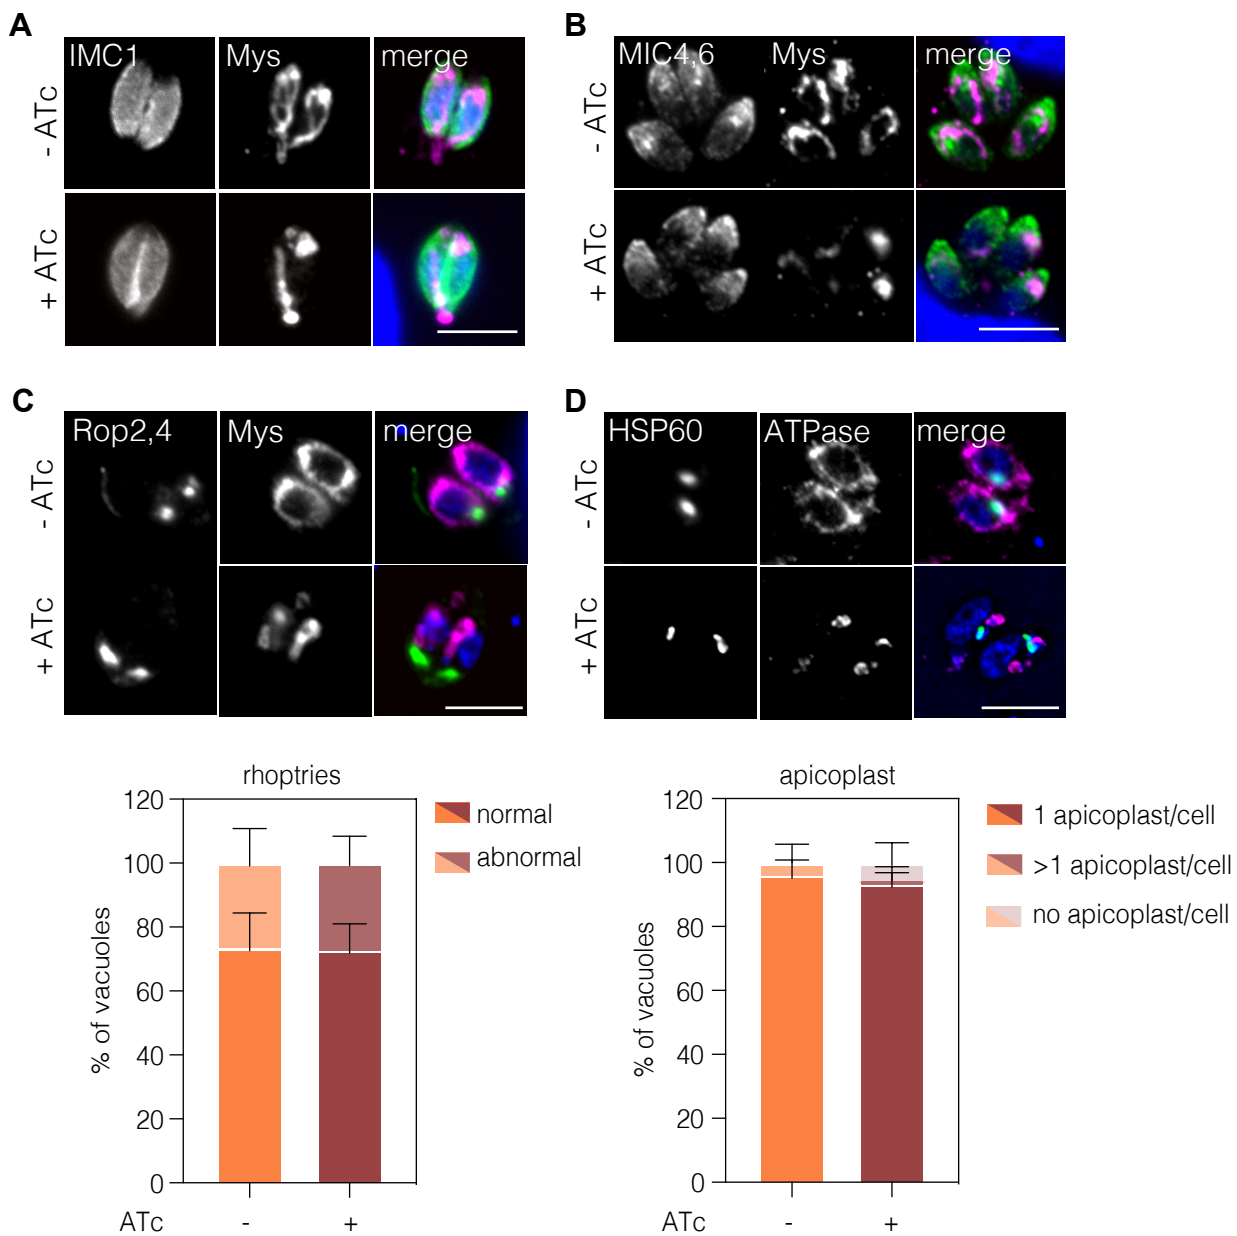

**Fig. S5. Depletion of VDAC does not affect other organelles besides mitochondrion and ER**

iVDAC parasites ATc treated for 48 h were fixed and stained using markers for various organelles. No difference in parasite structure (from at least 260 parasites), as visualized by anti-IMC1 (A) or micronemes (from at least 174 parasites), visualized using anti-MIC4, 5 (B) could be seen upon VDAC depletion. Imaging and quantification of the rhoptries (C) using anti-ROP2, 4 and the number of apicoplasts (D) using anti-HSP60. No significant differences could be seen in either organelle. Results mean of three independent experiments, + SD. Scale bar 5  $\mu$ m.

**Table S1.** List of primers used in this study

| Primer number | Description |                                                                                  |
|---------------|-------------|----------------------------------------------------------------------------------|
| P1            | Nsil_vdac_R | cccatgcataggcacagatctcgagcttc                                                    |
| P2            | Pacl_vdac_R | cccttaattaattaggcacagatctcgagcttc                                                |
| P3            | VDAC_gR_F   | aagttTGACTCAACTCCGACAAAag                                                        |
| P4            | VDAC_gR_R   | aaaacTTTTGTCTGGAGTTGAGTACAa                                                      |
| P5            | VDAC_PR_F   | TCCCTCTCTCCGGGAATCTTAGCCGTTTCTGTGTACTCAACTCCGACAAA<br>aagcttcgccaggctgtaaatcc    |
| P6            | VDAC_PR_R   | CAATTTTCCGTACCCGCACAGCTTTTGTTC AAGTCCTTGAAGAGCACCAT<br>ggttgaagacagacgaaagcagttg |
| P7            | VDAC_test_F | CCCTTTTTTCCGTTTGC GGTGTTAC                                                       |
| P8            | DHFR_R      | CACGGTTATCAAACCCGAG                                                              |
| P9            | VDAC_test_R | CACAGAAACAAGTTTTGGGCTTTAAACACG                                                   |
| P10           | T7S4_F      | CGGTTGCTTGAAGAAGG                                                                |
| P11           | qVDAC_F     | TGAGAAGGCATGGGACTTG                                                              |
| P12           | qVDAC_R     | CGCATATTTGACGTCGATG                                                              |

**Table S2.** List of antibodies used in this study

| Antibody            | Species | Dilution (IFA unless indicated) | Source                                                    | Reference                |
|---------------------|---------|---------------------------------|-----------------------------------------------------------|--------------------------|
| CPN60 (HSP60)       | Rabbit  | 1:1000                          | Boris Striepen (University of Pennsylvania)               | (Agrawal et al., 2009)   |
| IMC1                | Rabbit  | 1:2000                          | Gary Ward (University of Vermont)                         | (Wichroski et al., 2002) |
| Mys (TgME49_215430) | Rabbit  | 1:1000                          |                                                           | (MacRae et al., 2012)    |
| Myc                 | Mouse   | 1:1000                          | Cell Signaling                                            |                          |
| Myc                 | Rabbit  | 1:1000                          | ThermoFisher                                              |                          |
| GAP45               | Rabbit  | 1:10000                         | Dominique Soldati (University of Geneva)                  | (Plattner et al., 2008)  |
| Sag1                | Mouse   | 1:1000                          | Sebastian Lourido (Whitehead Institute)                   | (Burg et al., 1988)      |
| ROP2,4              | Mouse   | 1:500                           |                                                           | (Sadak et al., 1988)     |
| F1-ATPase           | Mouse   | 1:3000                          | Peter Bradley (University of California, Los Angeles)     | (Beck et al., 2014)      |
| MIC4                | Rabbit  | 1:5000                          |                                                           | (Reiss et al., 2001)     |
| Actin               | Mouse   | 1:100                           | Markus Meissner (Ludwig-Maximilians University of Munich) | (Angrisano et al., 2012) |

**Table S3.** Accession numbers of identified proteins.

[Click here to download Table S3](#)
